# Supplementary material for: Simultaneous synthesis of luminescent carbon nanoparticles and carbon nanocages by laser ablation of carbon black suspension and their optical limiting properties
Source: Royal Society of Chemistry journal article supplement (doi:10.1039/c1jm14510j), 2011-12-05
Supplement: c1jm14510j.pdf [file c1jm14510j.pdf]

## Supplementary Materials

### Simultaneous synthesis of luminescent carbon nanoparticles and CNCs by laser ablation of carbon black suspension and their optical limiting properties

Shengliang Hu<sup>a,b\*</sup>, Yingge Dong<sup>b</sup>, Jinlong Yang<sup>b,c</sup>, Jun Liu<sup>a</sup>, Shirui Cao<sup>b</sup>

<sup>a</sup>Key Laboratory of Instrumentation Science & Dynamic Measurement, Ministry of Education, Science and Technology on Electronic Test and Measurement Laboratory, Taiyuan 030051, P. R. China

<sup>b</sup>School of Material Science and Engineering, North University of China, Taiyuan 030051, P. R. China

<sup>c</sup>State Key Laboratory of New Ceramics and Fine Processing, Tsinghua University, Beijing 100084, P. R. China

#### Fluorescence Quantum Yield

The quantum yield was measured based on the following equation. The detail method has been reported in our previous work (Hu et al. *J. Mater. Chem.* 2009, **19**, 484).

$$Q = Q_R \frac{I \cdot A_R \cdot \eta^2}{I_R \cdot A \cdot \eta_R^2} \quad (1)$$

where  $Q$  is the quantum yield,  $I$  is the measured integrated emission intensity,  $\eta$  is the refractive index, and  $A$  is the optical density. The subscript  $R$  refers to the reference fluorophore of known quantum yield.

Table 1S Quantum yield of luminescent CNPs

| Sample          | Integrated Emission Intensity ( $I$ ) | Absorption at 400 nm ( $A$ ) | Refractive Index of solvent ( $\eta$ ) | Quantum yield ( $Q$ ) |
|-----------------|---------------------------------------|------------------------------|----------------------------------------|-----------------------|
| Quinine sulfate | 281.23                                | 0.067                        | 1.33                                   | 54% (known)           |
| Sample A        | 41.7                                  | 0.065                        | 1.36                                   | 8.63% (calculated)    |

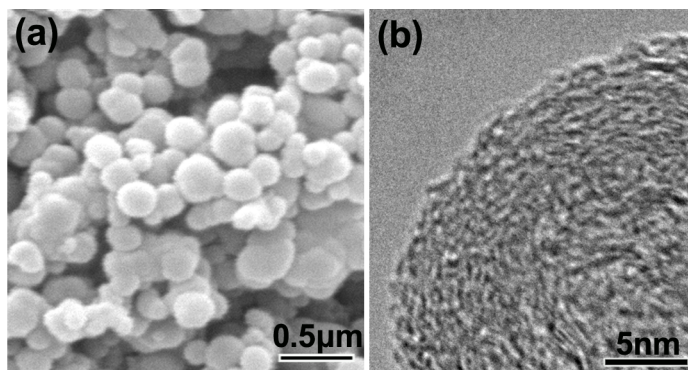

**Fig. 1S** Morphology and microstructure of carbon black used in the experiment. (a) SEM images of the used carbon black. (b) HRTEM image of the microstructure of carbon black.

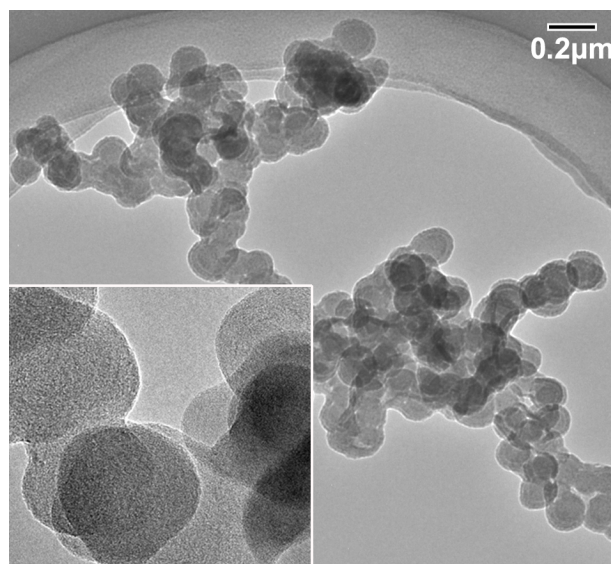

**Fig. 2s** TEM images of carbon black treated by violent ultrasonic dispersion; the inset shows the HRTEM images of microstructures between carbon black.

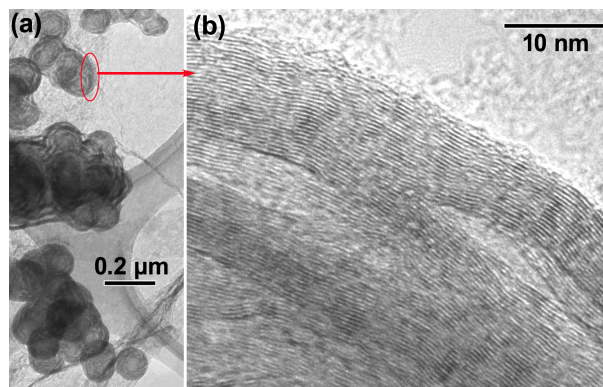

**Fig. 3S** TEM and HRTEM images of the samples obtained at LPD of  $6 \times 10^5 \text{ W} \cdot \text{cm}^{-2}$ .
